# Supplementary material for: Challenges Faced by Health Managers in Healthcare Delivery Systems in Bangladesh
Source: Research Square preprint supplement (doi:10.21203/rs.3.rs-6792321/v1), 2025-06-25
Supplement: Supplementary file 1 [file a0067dfcbdb57d3be247bb45.docx]

# Questionnaire for the respondents (English Version)

## Title: Challenges Faced by Health Managers in Healthcare Delivery System in Bangladesh

*Please complete the following questionnaire with specific regard by writing the appropriate response code in the respective box. If there is a statement, choose the option/s that reflects your opinion. In some questions, you may give multiple responses; the directions will be attached to those questions. There are few questions that allows you to state an option as “others”. In case you choose that option, please write your opinion in brief. If there’s any query, feel free to contact the interviewer.*

| Section-I: Particulars of the respondent | | | | | | | | | | | | |
| --- | --- | --- | --- | --- | --- | --- | --- | --- | --- | --- | --- | --- |
| Serial no: ______ | | Date of data collection: / / | | | | | | | | | | |
| Location of facility: _________________________________________________ | | | | | | | | | | | | |
| Section-II: Sociodemographic characteristics of the respondent | | | | | | | | | | | | |
| **Question** | **Options** | | | | | | | | | | **Code** | |
| 1. Age (In completed years) |  | | | | | | | | | |  | |
| 1. Sex | 1=Male | | | | 2=Female | | | | | |  | |
| 1. Religion | 1=Islam | | | | 4=Buddhism | | | | | |  | |
| 2=Hinduism | | | | 5= Others | | | | | |
| 3=Christianity | | | |  | | | | | |
| 1. Marital status | 1=Married | | | | 4=Separated | | | | | |  | |
| 2=Unmarried | | | | 5= Widow/ Widower | | | | | |
| 3=Divorced | | | |
| 1. Family type | 1=Nuclear | | | 3=Extended | | | | | | |  | |
| 2=Joint | | |  | | | | | | |
| 1. Number of Family members | _____ (In number) | | | | | | | | | |  | |
| 1. Type of facility | 1. Office of UH&FPO 2. Office of Civil Surgeon 3. Office of Director (Health) | | | | | | | | | |  | |
| 1. Record Facility Location | 1. Urban | | | | | 1. Rural | | | | |  | |
| 1. How long have you been working as a Health manager? | | | | | | | | | _____ years | | | |
| 1. How many different stations have you worked as a health manager? | | | | | | | | | _____ (In number) | | | |
| 1. Email address: ____________________________________________________ | | | | | | | | | | | | |
| Section-III: Working environment | | | | | | | | | | | | |
| Role within working environment | | | | | | | | | | | | |
| **Questions** | | | | | | | **Options** | | | | | **Code** |
| 1. You are fully **empowered** to conduct your duties (If yes, go to ques. No. 14) | | | | | | | 1. Yes | 1. No | | | |  |
| 1. If No, what is the most **important** aspect you feel to be empowered with? | | | | | | | 1. Financial freedom 2. Magistracy for health managers within their field of work 3. Others, please specify:   _____________________________  _____________________________ | | | | |  |
| Target driven stress in workplace | | | | | | | | | | | | |
| 1. How many **hours** do you **work** per week? | | | | | | | _____ hours | | | | |  |
| 1. How would you like to state your current **routine workload**? | | | | | | | 1. Light workload 2. Moderate/ Normal workload 3. Significant workload | | | | |  |
| 1. Do you suffer from **target driven stress** in workplace? (If no, go to ques. No. 20) | | | | | | | 1. Yes 2. No | | | | |  |
| 1. If Yes, which **frequency** of targets are more stressful to you? | | | | | | | 1. Monthly 2. Quarter Yearly | | | 1. Half-yearly 2. Yearly | |  |
| 1. What is the main concern for experiencing **target driven stress**? | | | | | | | 1. Tough targets to achieve 2. stipulated time is not enough 3. Suboptimal availability of resource 4. Delay in resource allocation 5. Others, please specify:   _____________________________ | | | | |  |
| 1. Please state **your thoughts** on target driven stress, which effects productivity of you and your team | | | | | | | _____________________________  _____________________________ | | | | |  |
| 1. Are you suffering from any **disease** which deteriorate/ aggravate in stressful condition? | | | | | | | 1. Yes 2. No | | | | |  |
| 1. If yes, what is/are that/they? [Choose multiple options, if appropriate] | | | | | | | | | | | |  |
| 1. Diabetes mellitus 2. Coronary Artery Disease 3. Essential Hypertension 4. Bronchial Asthma 5. Generalized anxiety disorder | | | 1. Depressive disorder 2. Tension type headache 3. Irritable bowel syndrome 4. Others, please specify:   ……………………………. | | | | | | | | |
| Motivation and attitude of health workers | | | | | | | | | | | | |
| 1. **Doctors** at your facility are **motivated** to do their jobs properly (If yes, go to ques. No. 24) | | | | | | | 1. Yes 2. No | | | | |  |
| 1. If No, what are the reasons:   [Choose multiple options, if appropriate] | | | | | | | 1. Overload of work 2. Unavailability of family time 3. Poor workplace environment 4. Conflict with colleagues 5. More interested in obtaining post-graduation 6. Others, please specify:   _____________________________ | | | | |  |
| 1. **Other healthcare providers** are motivated to do their jobs properly (If yes, go to ques. 26) | | | | | | | 1. Yes 2. No | | | | |  |
| 1. If No, what are the reasons:   [Choose multiple options, if appropriate] | | | | | | | 1. Overload of work 2. Unavailability of family time 3. Poor workplace environment 4. Conflict with colleagues 5. Others, please specify:   _____________________________ | | | | |  |
| Working relationships with colleagues | | | | | | | | | | | | |
| 1. Does increased workload affect your **relationship** with your colleague? | | | | | | | 1. Negatively affect 2. Doesn’t affect 3. Positively affect | | | | |  |
| 1. State the relationship between **same grade colleagues** (e.g., UHFPO and Junior consultant) in your facility? | | | | | | | 1. Unhealthy relationship 2. Healthy relationship | | | | |  |
| Persistence of stereotyping | | | | | | | | | | | | |
| 1. Did you face **gender-based stereotyping** at any stage of your professional life? | | | | | | | 1. Yes 2. No | | | | |  |
| 1. **Female Health managers** face more gender-based stereotyping | | | | | | | 1. Yes 2. No | | | | |  |
| 1. Health managers need additional security at residence | | | | | | | 1. Yes 2. No | | | | |  |
| Section–IV: Career progression | | | | | | | | | | | | |
| Recruitment process | | | | | | | | | | | | |
| 1. After recruitment, it is better to have **specific sub-division** for Health managers. | | | | | | | 1. Agree 2. Disagree | | | | |  |
| Career tracks within the health service | | | | | | | | | | | | |
| 1. What do you feel about the clarity of **career path** for Health managers? | | | | | | | 1. Ill defined 2. Clearly defined | | | | |  |
| 1. It is possible for you to reach the apex of the career path of BCS Health Cadres (If yes, go to ques. No. 35) | | | | | | | 1. Yes 2. No | | | | |  |
| 1. If No, which is/ are the obstacle to do so?   [Choose multiple options, if appropriate] | | | | | | | 1. Unclear career path 2. requirements for promotion are difficult to be fulfilled side by side with current responsibilities 3. Not enough posts against the number of candidates 4. Others, please specify:   …………………………………… | | | | |  |
| 1. Health managers need to be issued **“Non-Practicing Allowance”** | | | | | | | 1. Yes 2. No | | | | |  |
| Promoting expertise in public health | | | | | | | | | | | | |
| 1. Do you have an **academic degree** in Public Health (e.g., MPH, MPhil, MSc)? (If yes, go to ques. No. 39) | | | | | | | 1. No 2. Yes, from private institution 3. Yes, from government institution | | | | |  |
| 1. If No, do you think academic Degree in Public Health makes one **better equipped** for the administrative posts | | | | | | | 1. Yes 2. No | | | | |  |
| 1. If No, do you want to obtain an academic degree in Public Health in future? | | | | | | | 1. Yes 2. No | | | | |  |
| 1. If Yes, are you benefiting in your practical work from your knowledge obtained from academic degree in Public Health? | | | | | | | 1. Yes 2. No | | | | |  |
| Promotion of higher education | | | | | | | | | | | | |
| 1. Currently there are enough opportunities to pursue academic degrees in public health | | | | | | | 1. Yes 2. No | | | | |  |
| 1. Current **monitoring and evaluation systems** promote creativity and expertise for Health Managers | | | | | | | 1. Yes 2. No | | | | |  |
| In service capacity building | | | | | | | | | | | | |
| 1. Health managers receive adequate **Capacity building activity** for maintaining their expertise in healthcare delivery system | | | | | | | 1. Yes 2. No | | | | |  |
| 1. Health managers receive adequate **trainings** for maintaining their expertise in healthcare delivery system | | | | | | | 1. Yes 2. No | | | | |  |
| 1. Health managers receive adequate **Refresher training** for maintaining their expertise in healthcare delivery system | | | | | | | 1. Yes 2. No | | | | |  |
| 1. Health managers sometimes get posted in a post where they don’t have prior experience. Should they receive **separate capacity building** for these situations? | | | | | | | 1. Not needed 2. Better if offered, but not essential 3. Essential | | | | |  |
| 1. What do you feel about current **8-week** Special Foundation training Course (SFTC)? (If response is 1, go to ques. No. 48) | | | | | | | 1. Current program’s duration and contents are fine 2. Changes needed in foundation training course for health cadre | | | | |  |

| 1. If response is 2, what should be different with current ongoing program? | 1. Longer Duration 2. Elaborate Contents 3. Different contents 4. Training similar to 6-month regime of other cadres 5. Others, please specify:   …………………………………… | | |  | |
| --- | --- | --- | --- | --- | --- |
| Section-V: Resources and infrastructure | | | | | |
| Resource allocation to health and Resource management | | | | | |
| 1. What was your **bed occupancy rate** (BOR) in the year 2022-23? | ………. (In percentage) | | | |  |
| 1. What’s your opinion on **current quota** of resource allocation for your bed occupancy rate? (If response is 2/ 3, go to ques. 51) | 1. Sub-optimal 2. Optimum 3. Overestimate | | | |  |
| 1. If No, in which field do you think more emphasize could be given during budget allocation? (If yes, go to ques. No. 51) | ____________________________  ____________________________ | | | |  |
| 1. Is there a **storekeeper** in your facility for maintaining store activities? | 1. Yes, posted as storekeeper 2. Yes. posted in other post, but assigned as storekeeper 3. No, there’s no storekeeper | | | |  |
| 1. How **frequently** does your store need to be opened? | 1. Daily | 1. 2-3 times/ week | | |  |
| 1. Weekly | 1. <Once per week | | |
| 1. Storekeeper keeps track of all incoming and outgoing goods in **Ledger Book** | 1. Yes 2. No | | | |  |
| 1. Are there **bin cards** to track the changes in stock of goods? | 1. Yes 2. No | | | |  |
| 1. Is there any **Medical Officer** assigned to look after the store activities? | 1. Yes, RMO is assigned 2. Yes, MO is assigned 3. No | | | |  |
| 1. How many **rooms are allocated** as store in your facility? | _____ (in number) | | | |  |
| 1. What is the main **challenge** you face while store management   [Choose multiple options, if appropriate] | | |  | |  |
| 1. Unavailability of adequate space for storing all the resources 2. Lack of compliance of staffs to follow rules of store 3. Lack of competency of the storekeeper 4. Lack of motivation of the assigned RMO/MO 5. Lack of proper training about modern methods of store management 6. Others, please specify: ___________________________________ | | | | |
| Maintenance of healthcare infrastructure | | | | | |
| 1. How often does the **Hospital Management Committee** meet? | 1. At Least Monthly 2. At Least once every 3 Months 3. At Least once every 6 Months 4. Less often than once every 6 Months | | | |  |
| 1. When was the **recent** Hospital Management Committee Meeting? | ______ months ago | | | |  |
| 1. After a meeting of Hospital Management Committee who is **responsible** for monitoring the progress of the decisions taken in the meeting? | 1. Chairperson (Local MP) 2. Vice Chairperson (Local Upazilla Parishad Chairman or Female Vice Chairman) 3. Member Secretary (i.e. UHFPO) 4. Others, please specify:   ………………………………… | | | |  |
| 1. While executing your duties in co-ordination with other Government offices, do you face any **challenges**? (If no, go to ques. No. 63) | 1. Yes 2. No | | | |  |

| 1. If Yes, what challenges do you face? [Choose multiple options, if appropriate] | |  |
| --- | --- | --- |
| 1. Improper knowledge of other officers about how the health sector operates 2. Improper knowledge of other officers about allocation of resources in health sector 3. Improper knowledge of other officers about lack of workforce in health sector 4. Lack of cooperation 5. Lack of coordination of upazilla parishad with upazilla health division for spending Health budget 6. Others, please specify: …………………………………………………. | |  |
| 1. Does **local situation/ pressure** affect you and your employees’ productivity? [If response is ‘1’, go to ques no 65. If response is ‘2’, go to ques no 66] | 1. Yes, negatively affect 2. No, doesn’t affect 3. Yes, positively affect |  |
| 1. If answer of 63 is yes, positively affect, who do you think is the **most important person** to ensure that the local situation has a positive impact on your employees? | 1. Local Member of Parliament (MP) 2. Upazilla Nirbahi Officer (UNO) 3. Local Assistant Commissioner (Land) 4. Local Upazilla Parishad Chairman 5. Others, please specify:   ………………………………… |  |
| 1. If answer of 63 is yes, negatively affect, what is/ are the **main reason/s** for it? [Choose multiple options, if appropriate] 2. Local political situation 3. Undue pressure to issue illness certificate 4. Undue pressure to issue medical certificate without evidence 5. Undue pressure to allocate medicines from hospital dispensary without any indication 6. Undue pressure to allow staffs to follow office time at their own will 7. Diagnostic centers’ pressure to send patients to them for investigations 8. Threats of physical assault from local people including local public representatives 9. Psychological torture from local people including local public representatives 10. Others, please specify: ………………………………………………………. | |  |
| Human resources status | | |
| 1. How many office staffs are **posted** at your office? (Answer in number. Leave blank if exact figure is not known) | ……… |  |
| 1. How many office staffs are **allotted** at your office? (Answer in number. Leave blank if exact figure is not known) | ……… |  |
| 1. How well does the current organogram of **office staff** match the manpower required to handle the present workload? | 1. Sub-optimal 2. Optimum 3. Overestimate |  |
| 1. How well does the current organogram of **field staff** match the manpower required to handle the present workload? | 1. Sub-optimal 2. Optimum 3. Overestimate |  |
| 1. Staffs are **motivated** to share increased workload if there’s inadequate manpower (If yes, go to ques. No. 72) | 1. Yes 2. No |  |
| 1. If is No, what can be offered to motivate them to share the burden of increased workload? [Choose multiple options, if appropriate] | 1. Financial Incentive 2. Rotatory sharing of workload 3. Others, please specify:   ………………………………… |  |
| 1. Your staffs are motivated to serve the people in case of any emergency | 1. Yes 2. No |  |

Heartfelt thanks for taking part and providing valuable information in this research.

_______________________

Md. Mesba Ul Hasan Roman (Interviewer)

Date:
